# Supplementary material for: CRISPRoff enables spatio-temporal control of CRISPR editing
Source: PubMed Central journal article supplement (PMC7542431; doi:10.1038/s41467-020-18853-3), 2020-10-07
Supplement: 41467_2020_18853_MOESM1_ESM.pdf [file 41467_2020_18853_MOESM1_ESM.pdf]

**Supplemental information for:**

**CRISPRoff enables spatio-temporal control of CRISPR editing**

Carlson-Stevermer et. al

## SUPPLEMENTAL FIGURES

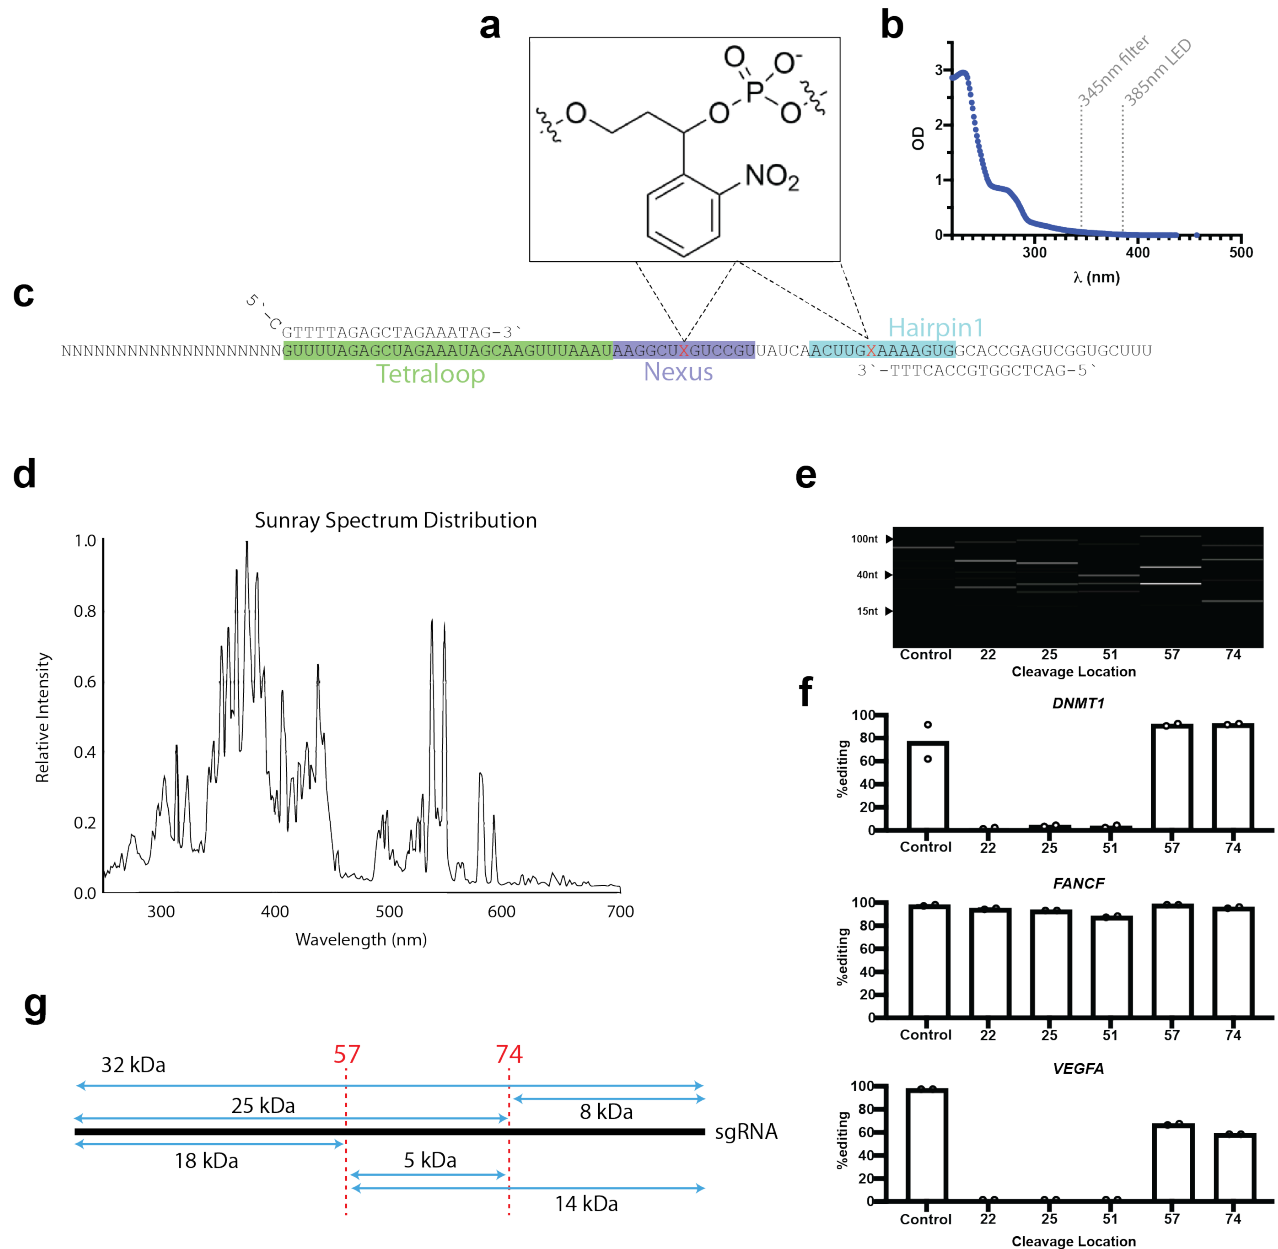

**Supplementary Figure 1: a.)** Chemical structure of *o*-nitrobenzyl photocleavable (PC) linker incorporated into backbone of CRISPRoff sgRNAs. **b.)** Absorption spectrum of PC linker phosphoramidite solution in acetonitrile. Upon absorbing light at indicated wavelengths, PC linker undergoes selective bond cleavage, resulting in fragmentation of the DBsgRNA backbone. Dotted lines indicate the major wavelengths of light sources used in this work. **c.)** Sequence of CRISPRoff sgRNA backbone, including incorporated

PC linkers (red 'X'). *Top and Bottom:* overlay of PCR primers used for amplification of sgRNA backbone for ddPCR quantification. **d.)** Spectral output of Sunray UV curing system, the main light source used in this work. **e.)** Fragment analysis of cleaved CRISPRoff sgRNAs with a single replacement nucleotide. All lanes corresponding to CRISPRoff sgRNA show a decrease in full-length RNA and exhibit two bands corresponding to the length of each RNA fragment split at the indicated nucleotide. In these assays some full length sgRNA remained. **f.)** Editing activity of various CRISPRoff spacer locations targeting three genomic loci (*DNMT1*, *FANCF*, and *VEGFA*). Replacing nucleotides with a photocleavable linker in some positions (22) abolished editing efficiency, while others (57, 74) preserved activity (n=2 experimental replicates, data is presented as mean). **g.)** CRISPRoff sgRNA fragments following cleavage. CRISPRoff sgRNAs can be cleaved at either or both locations and rendered inactive. CRISPRoff sgRNAs cleaved at position 57 give rise to fragments of 18 kDa and 14 kDa. CRISPRoff sgRNAs cleaved only at position 74 give rise to fragments of 24 kDa and 8 kDa. CRISPRoff sgRNAs cleaved at both locations give rise to fragments of 18 kDa, 5 kDa, and 8 kDa. All of these species are seen in ESI traces (Figure 1b). Source data are provided as a Source Data file.

**a**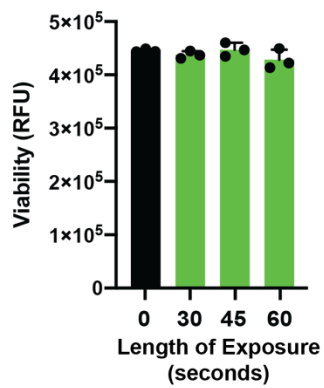**b**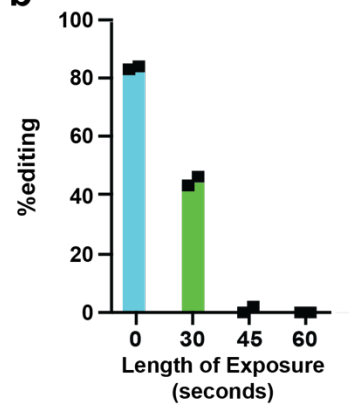**c**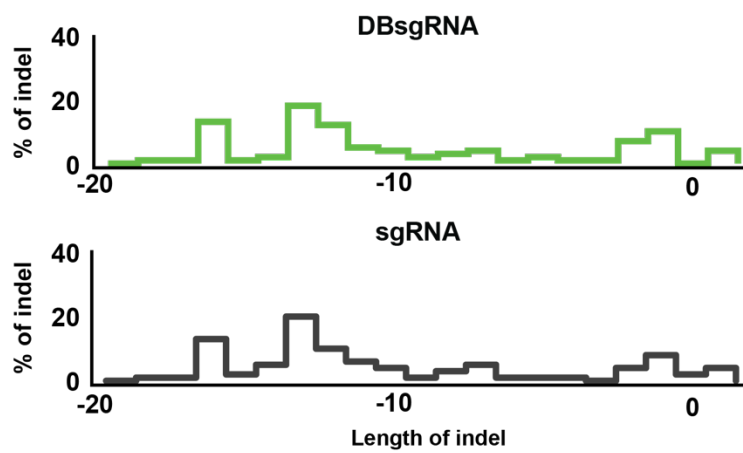**e**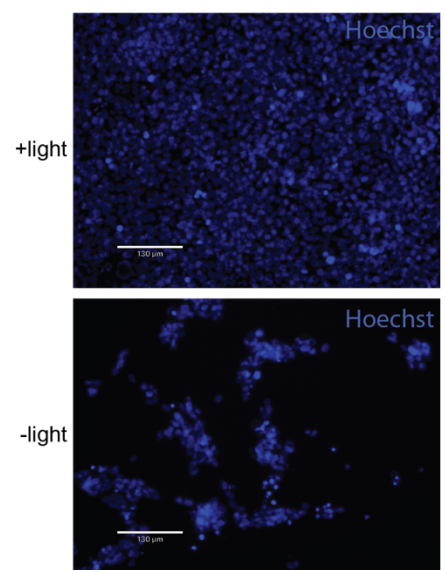**d**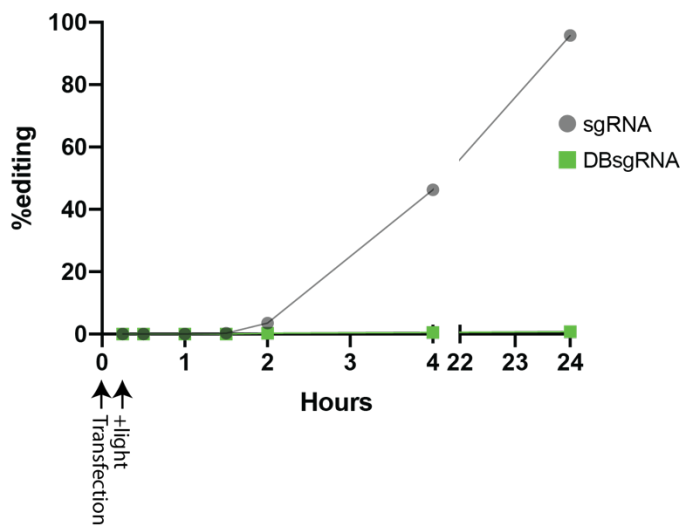

**Supplementary Figure 2:** **a.)** Effect of UV light from curing lamp on cell viability. Cells were left in the dark or exposed to light under a 345 nm longpass filter. This filter removes all wavelengths shorter than 345 nm that may cause DNA damage. Using these filters, cell viability was not significantly different compared to unexposed cells (n=3 technical replicates  $p=0.27$ , one-way ANOVA, data is presented as mean $\pm$ 1 SD). **b.)** Effect of light exposure duration on ablation of editing. Longer periods of exposure were more efficient at cleaving DBsgRNAs, achieving complete ablation between 45-60 seconds (n=2 biological replicates, data is presented as mean). **c.)** Indel profile of CAMK1 DBsgRNA and standard sgRNA. Indel profiles of both sgRNAs are similar, suggesting that DBsgRNAs do not change the repair mechanism of DSBs. **d.)** High resolution analysis of editing time course at the *FANCF* locus. Transfected cells were exposed to light 15 minutes post-transfection. Genomic DNA was harvested 15, 30, 60, 90, 120 minutes and 4 and 24 hours post-transfection. Using standard sgRNAs, 45% of alleles had already undergone a DSB and been repaired with an indel mutation 4 hours post-transfection. This activity was not seen using CRISPRoff sgRNAs suggesting editing at this locus can be controlled. **e.)** Editing using a DBsgRNA with an off-target site in a known essential gene. Lack of inactivation caused high degree in cell death as seen through loss of confluency. Inactivation of DBsgRNA rescued viability in these cells (image representative of 3 independent experiments, scale bar: 130  $\mu$ m). Source data are provided as a Source Data file.

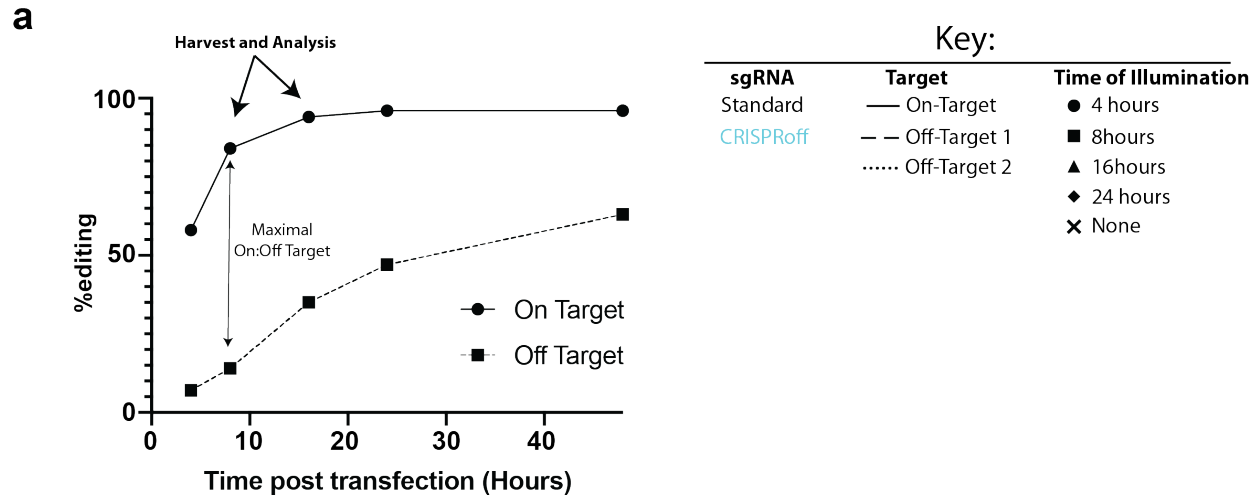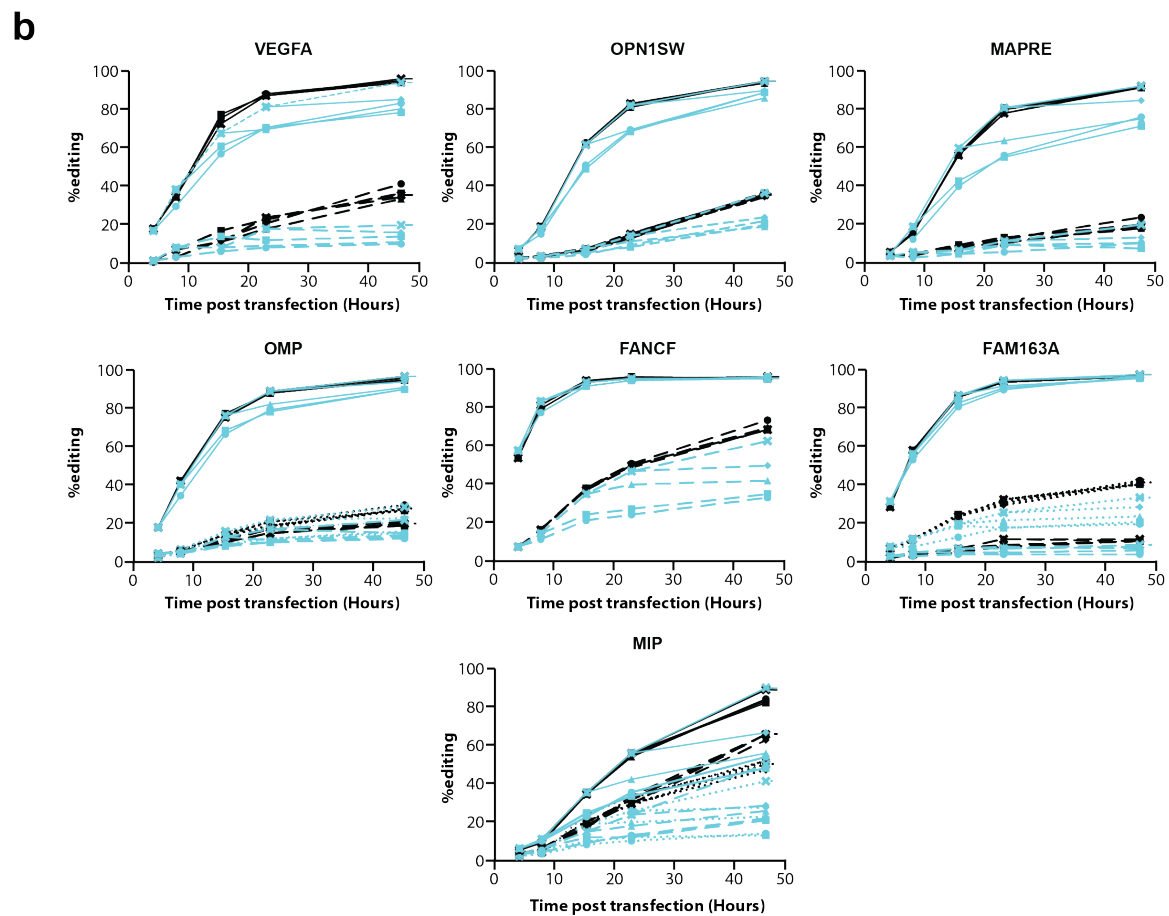

**Supplementary Figure 3: a.)** Ratio of on:off-target editing at various time points post transfection at the *FANCF* locus. On-target gene editing happens quickly and reaches saturation while off-target editing lags before becoming saturated at later timepoints. Identification of these inflection points can minimize the harm of off-target editing events.

**b.)** Absolute values of on and off-target editing events at seven genomic loci. Cells were transfected with either standard sgRNAs or CRISPRoff sgRNAs. Cell pools were then illuminated at either 4, 8, 16, 24, or 48 hours post transfection. At these same time points, separate cell pools were harvested and analyzed for the presence of indels. Off-target effects were lower at assay endpoint in samples that were illuminated sooner after transfection. Source data are provided as a Source Data file.

## SUPPLEMENTARY TABLES

**Supplementary Table 1: List of sgRNAs used**

| <b>Target</b> | <b>Protospacer Sequence</b> |
|---------------|-----------------------------|
| AAVS1         | GGGGCCACTAGGGACAGGAT        |
| BUB1B         | AGTGAAGCCATGTCCCTGGA        |
| CAMK1_sg1     | TGCCAGGATCACCTCCGAGA        |
| CAMK1_sg2     | GCGTCCTCTTATCTTCTGCC        |
| CEL           | AACCAGTTGCAGGCGCCCCA        |
| Chr8q23_sg1   | TTATAGTTACGATGTTTGAT        |
| Chr8q23_sg2   | AGTCTACTATGAGTTTTCTG        |
| CXCR4         | GATAACTACACCGAGGAAAT        |
| DNMT1         | GGAGTGAGGGAAACGGCCCC        |
| EMX1          | GAGTCCGAGCAGAAGAAGAA        |
| FAM163A       | CTGCAGGGCTCGCTGGTGAG        |
| FANCF         | GCTGCAGAAGGGATTCCATG        |
| GAA           | AGGAGCCGGTGGGAGCAGGG        |
| GRK1          | GCCGTCAAAGCTGCCTCGGG        |
| ITGA7         | GGTGCTGGAGGGCGAGGCTG        |
| IRAK4         | GTCCTGTCTTTGTACAGAA         |
| MAPRE1        | TTCTCTGCAGATAATTCCTG        |
| MIP           | GCTGGGGTCCTCACTGCGCT        |
| OMP           | GAACTGTAGCCGCTGCTGCT        |
| OPN1SW        | ACAGGGGCAATGTGGTACTG        |
| PRGN          | CAGATGCCTGCTCAGTGTTG        |
| PRKAG3_sg1    | AGCAAGAAAACAGCAGCTCA        |
| STK3_sg1      | AAAGCAATACACAAGGAATC        |
| STK3_sg2      | CCATAATGCAGCAATGTGAC        |
| VEGFA         | GGTGAGTGAGTGTGTGCGTG        |
| GFP-C1        | CTTCAGGGTCAGCTTGCCGT        |



**Supplementary Table 2: List of primers used**

| Target      | Primer F                     | Primer R                       | Primer Seq                         |
|-------------|------------------------------|--------------------------------|------------------------------------|
| AAVS1       | GCCCCATGTCCACTTCAG<br>G      | CTCAGGTTCTGGGAGAGGGT           | CTCCATCGTAAGCAAACCTTAGAGG          |
| BUB1B       | AGAAATCCTCCCCTTCGG<br>C      | GCAGATTCTTGTGCCAGTGC           | CAGCTAACAAAGAAGCTTAGGCATATAA<br>TA |
| CAMK1_sg1   | ACAACCCTGCCAAGTGGAA<br>A     | ACTAGGGGAGGGTCATCCAC           | CATTTTATAAAGGGGCAATTTAAGGCTT<br>AG |
| CAMK1_sg2   | ACAACCCTGCCAAGTGGAA<br>A     | ACTAGGGGAGGGTCATCCAC           | CATTTTATAAAGGGGCAATTTAAGGCTT<br>AG |
| CEL         | CTGAGGGTGTAGAGGGGAG<br>G     | GTTCTACCTGGCACCTGTCC           | CCTGAGAGCTCATGAACAAGCAT            |
| Chr8q23_sg1 | CTCGTCAAACAAGGGTAA<br>GCA    | GTTTGAGTTGACCAAACGCA           | CAAGGGTAAGCAAAGAAATAAAATCTCT<br>TC |
| Chr8q23_sg2 | ACCTGTCACATTGCTGCAT<br>T     | GTTTGAGTTGACCAAACGCA           | TTGATTATTTCTGAAGATCTGATTCAA<br>CA  |
| CXCR4       | TTGTGCCCTTAGCCACTA<br>C      | CCAGAAGGGAAGCGTGATGA           | GTACTTGTCCGTCATGCTTCTCAGTTT        |
| DNMT1       | GATCAAGCTTTGTATGTTG<br>GCCAA | AATCCAGAATGCACAAAGTA<br>CTGC   | GATCAAGCTTTGTATGTTGGCCAA           |
| EMX1        | CAGCTCTGTGACCCTTTGT<br>TTG   | ACTAAACTACAGTGGTGCCT<br>GG     | CAGCTCTGTGACCCTTTGTTTG             |
| FAM163A     | GAGTGGTGGGAGGGGAAAA<br>G     | CATGTCAGCCGTCCGTATGT           | CTTGCAAAGCTGGGATTAGAACTT           |
| FANCF       | GATATTTCCAAAGCGAAAG<br>GAAGC | ATCAGAGAGTCCTCCTGGAG<br>ATTT   | GATATTTCCAAAGCGAAAGGAAGC           |
| GAA         | GGTGAGTCTCCTCCAGGAC<br>T     | CAGACTGTGCAAGTGCTCTG           | CTTTTCTCGCCCTTCCTTCTGG             |
| GRK1        | GTCTCTCTCGTCCAGCAAG<br>GG    | ATGTCTTTCCAGAGCTCCAG<br>GG     | GTCTCTCTCGTCCAGCAAGGG              |
| ITGA7       | GGTTGTCGCCAAACCTTCA<br>C     | GGGATTGGGGAGTCAAGAGC           | GAGTCAAGAGCACAAGAAACATGAGAAC<br>AT |
| IRAK4       | GCTTCTTGTGTGTGCTGTG<br>AG    | GCCTGTGATTGCTGCACAAA           | CAAGTTTCTAGTTTAACTTTTTCACAAC<br>CA |
| MAPRE1      | GGTACTCTTGAAGCAAAC<br>TGC    | CGCTGAATGAATATCTGGAA<br>CGC    | ACTGCATGAAACTTGCTTTATAAATTT<br>AGG |
| MIP         | TCAGCCAACCATTACCGTG<br>T     | TAAAGGGGACTGTCCACCCA           | CATTACCGTGTTGAGTGCTAGGTTTC         |
| OMP         | TTGAGAACTGAGTGGGGCT<br>G     | GCGTGTGATGAGGTTGGTGA           | TTGAGAACTGAGTGGGGCTG               |
| OPN1SW      | CCCCTAACCCCTTTTTCCC<br>C     | GTTTTGTGGGGTGGGAGGAT           | CTAACCCCTTTTTCCCCTGCAGTAC          |
| PRGN        | TGAGCTGGGTGGCCTTAAC<br>A     | CATTGGCAGGGCCCTTTTAT<br>C      | CCAGATGGTCAGTTCTGCCC               |
| PRKAG3_sg1  | ATGTAGGGAGACTGAGGCC<br>A     | GCCCATTTGGAAGCTTGCAAA          | TTGGGTCCAACCTCTGTGTTATGGAG         |
| STK3_sg1    | ACGGCAAACCCTGTCTCA<br>A      | TCCACAGAAAACCTCATAGTA<br>GACTT | AAACAAGGGTAAGCAAAGAAATAAAATC<br>TC |

|          |                              |                             |                                    |
|----------|------------------------------|-----------------------------|------------------------------------|
| STK3_sg2 | AAGCCATCCTCATCTGCCT<br>T     | ACACAAGGAATCCGGTCAAG<br>T   | GGAGAAACCCATCTCTACTAAAAATACA<br>AA |
| VEGFA    | GAAGCAACTCCAGTCCCAA<br>ATATG | GTTACAGCCTGAAAATTACC<br>CAT | GAAGCAACTCCAGTCCCAAATATG           |

**Supplementary Table 3: ddPCR primers**

| Primer Name | Sequence              |
|-------------|-----------------------|
| sgRNA_F     | CGTTTTAGAGCTAGAAATAGC |
| sgRNA_R     | GACTCGGTGCCACTTT      |

**Supplementary Table 4: List of off-target sites**

| Target     | On Target Sequence   | Off Target Sequence  |
|------------|----------------------|----------------------|
| MIP_OT1    | GCTGGGGTCTCACTGCGCT  | AGTGGGGTCTCACTGCACT  |
| MIP_OT2    | GCTGGGGTCTCACTGCGCT  | TGTGGGGCACTCACTGCGCT |
| FAM163_OT1 | CTGCAGGGCTCGCTGGTGAG | CTGCAGGGCCCGCTGGAGAG |
| FAM163_OT2 | CTGCAGGGCTCGCTGGTGAG | CTGCAGGGGACACTGGTGAG |
| OMP_OT1    | GAAGTGTAGCCGCTGCTGCT | AGGCTGTAGCCCTGCTGCT  |
| OMP_OT2    | GAAGTGTAGCCGCTGCTGCT | GAAGTACAGCCACTGCTGCT |
| FANCF_OT1  | GCTGCAGAAGGGATTCCATG | GCTGCAGAAGGGATTCCAAG |
| MAPRE_OT1  | TTCTCTGCAGATAATTCCTG | ATCTCTGCAGATAATCCCTG |
| OPN1SW_OT1 | ACAGGGGCAATGTGGTACTG | TTAGAGGCAATGTGGTACTG |
| VEGFA_OT1  | GGTGAGTGAGTGTGTGCGTG | TGTGGGTGAGTGTGTGCGTG |

**Supplementary Table 5: List of off-target sequencing primers**

| Target     | Primer F                     | Primer R                     | Primer Seq                          |
|------------|------------------------------|------------------------------|-------------------------------------|
| MIP_OT1    | CTCACAGCAAGGTGCACC<br>AC     | CACCCCTACACACTGCCT<br>TT     | CATTCGAAAATCCTATGCTGAGCT<br>TTCATAG |
| MIP_OT2    | CGGCTCCAGTGCTCTTTT<br>TT     | GGAGGGTACGCAAGGTTT<br>GG     | GCCTTTCTGACTCCCATCCTTC              |
| FAM163_OT1 | GTGGATAGGAGCATCTGC<br>CC     | GTGGGAGAAGGAGGTCAT<br>GC     | CCTCCCCATATGCTTGGAGTAAG             |
| FAM163_OT2 | GCCCACATTTGCACTGAC<br>TC     | GATCATGGTATGTGCGC<br>AC      | AGACAAGACACCACAGCAATTCC<br>AATTTTG  |
| OMP_OT1    | AGATCCTGGGGTCTCTG<br>TG      | CGCCTGCTTATCATTGG<br>GC      | GAAGTACAGACTTATGAGTGGTT<br>CTAAGAT  |
| OMP_OT2    | TTGCAACACCAGGGCTTT<br>CT     | CTTACAGGCTTCAGGGA<br>GG      | TAGCATTTCCTTCTTTAGAGGTT<br>GATTATG  |
| FANCF_OT1  | AGTTTCACATCCCTGTCT<br>TACCTC | AGACTCACAACATCCATC<br>AGAACA | AGTTTCACATCCCTGTCTTACCT<br>C        |
| MAPRE_OT1  | ACAGTTTGTGGGCTTTTT<br>GGT    | GCATTCTGCCCTGTTTGT<br>GG     | CATTTTGTAGCAAGGTCAGAAGGA<br>C       |
| OPN1SW_OT1 | TGGCCATAGGAAGCACAG<br>TC     | ATGATCCCCCTGTCTCTG<br>CT     | CTACCTCCCTCTCCTTAGCTTCT<br>C        |
| VEGFA_OT1  | AGGGACTTGAGTATCTGC<br>AGTTTT | TGAAGAGATATCTGCACC<br>CTCATG | AGGGACTTGAGTATCTGCAGTTT<br>T        |
